# Supplementary material
Source: PubMed Central journal article supplement (PMC2636867)

## Supplementary Appendix

This appendix has been provided by the authors to give readers additional information about their work.

Supplement to: Plenge RM, Seielstad M, Padyukov L, et al. *TRAF1-C5* as a risk locus for rheumatoid arthritis — a genomewide study. *N Engl J Med* 2007;357:1199-209.

## **SUPPLEMENTAL INFORMATION**

### **Subjects**

For SONORA, NICRAP and WRDBB, subjects were categorized according to standard broad racial categories (e.g. White, Black, Asian). For the NARAC family collection, a questionnaire detailing ancestry was administered to probands (see “Ethnicity Data Questionnaire”, Supplemental Table 2). For the purposes of this study, mixed racial membership excluded subjects from being considered in the “white” group. Participation rates in these studies are not available.

### **Genotyping (NARAC)**

All Illumina genotyping was performed at the Feinstein Institute for Medical Research Samples according to the Illumina Infinium 2 assay manual (Illumina, San Diego), as previously described<sup>31</sup>. All case samples and most controls were genotyped with the HumanHap550K beadchip; some of the controls samples were genotyped with the Illumina HumanHap300 and HumanHap240S beadchips, and the genotype files merged. We found no evidence of systematic difference in genotype call rates for SNPs genotyped with the three different Illumina beadchips by comparing plate membership to the top 10 principal components generated in EIGENSTRAT. To assess Illumina 550K genotype accuracy for the SNPs advanced to replication, a subset of the samples (n=405 cases, 133 controls) were re-genotyped using a different genotyping platform (Sequenom iPLEX Gold at the Broad Institute). We observed 99.605% concordance between the two genotyping platforms. NARAC-2 samples were genotyped using the Sequenom iPLEX GOLD platform at the Broad Institute.

### **Genotyping (EIRA)**

Genotyping of EIRA-I with the Illumina Human Hap300 v.1.0 chip containing probes for 317,503 SNPs was performed at the Genome Institute of Singapore. Samples included for analysis had call-rates > 96%, and more than 93% of samples had a SNP call-rate greater than 99% (mean = 99.7% for all completed samples). Forty-one samples were genotyped twice, with a mean concordance prior to any SNP QC filtering of 99.96% (median: 99.98%; min.: 99.24%; max.: 100%). EIRA-II samples were genotyped using the Sequenom iPLEX GOLD platform at the Genome Institute of Singapore.

### **Quality control filtering for NARAC-1 and EIRA-1.**

All genotype data was processed using the statistical software package PLINK<sup>23</sup>. We filtered the NARAC-1 and EIRA-1 datasets individually, and then merged the files for our final analysis. Each dataset was filtered as follows (see Table below for specific numbers): individuals with >5% missing genotypes, and SNPs with >5% missing data, control HWE p-values <0.00001, and MAF <0.01 were excluded. Next, we screened for sample contamination, evaluated related status, and removed individuals who appeared as genetic outliers using identity-by-state (IBS) sharing methods implemented in PLINK. We removed samples with excess sharing across all pairs of individuals, as this pattern is consistent with DNA sample contamination; we also removed one individual from any pair who appeared as first-degree relatives. We removed individuals if the nearest

neighbor was  $>4$  SD from the mean (“gross population stratification”). We used pairwise IBS values to define case-control clusters within NARAC-1 and EIRA-1 separately; some samples failed to cluster with another sample (“IBS singletons”). This set of samples and SNPs was merged to form the final dataset. There were 18,776 SNPs that passed QC filters in EIRA-1 that failed in NARAC-1, for a final set of 297,086 SNPs. We manually-reviewed all SNPs advanced to replication in our study to confirm quality of the genotype clusters.

### Quality control filtering for NARAC-2 and EIRA-2.

The NARAC-2 and EIRA-2 datasets were filtered individually based on SNP genotype call rates ( $<95\%$  completeness), minor allele frequency (MAF $<0.01$ ) and Hardy-Weinberg Equilibrium ( $P<0.01$ ); we removed individuals with  $>5\%$  missing genotypes. A total of 485 cases and 1,282 controls (NARAC-2) and 568 cases and 516 controls (EIRA-2) were available for final analysis. For these samples, the call rates of the 9 tag SNPs were  $\geq 99.1\%$  for NARAC-2 and EIRA-2 (except for rs7026551, which had call

| <b>NARAC-1 - samples</b>        | <b>case</b> | <b>controls</b> |
|---------------------------------|-------------|-----------------|
| <b>initial set</b>              | 908         | 1,260           |
| >5% missing genotypes           | 22          | 29              |
| possible contamination          | 0           | 0               |
| cryptic family relationship     | 4           | 6               |
| gross population stratification | 9           | 29              |
| IBS singletons                  | 10          | 14              |
| <b>FINAL SET</b>                | <b>863</b>  | <b>1182</b>     |

| <b>NARAC-1 - SNPs</b> |                |
|-----------------------|----------------|
| <b>initial set</b>    | 545,080        |
| >5% missing genotypes | 18,707         |
| HWE ( $<0.0001$ )     | 2,778          |
| MAF ( $<0.01$ )       | 22,851         |
| <b>FINAL SET</b>      | <b>502,757</b> |

| <b>EIRA-1 - samples</b>         | <b>case</b> | <b>controls</b> |
|---------------------------------|-------------|-----------------|
| <b>initial set</b>              | 660         | 663             |
| >5% missing genotypes           | 0           | 0               |
| possible contamination          | 0           | 0               |
| cryptic family relationship     | 3           | 2               |
| gross population stratification | 11          | 4               |
| IBS singletons                  | 14          | 4               |
| <b>FINAL SET</b>                | <b>632</b>  | <b>653</b>      |

| <b>EIRA-1 - SNPs</b>  |                |
|-----------------------|----------------|
| <b>initial set</b>    | 317,503        |
| >5% missing genotypes | 911            |
| HWE ( $<0.0001$ )     | 259            |
| MAF ( $<0.01$ )       | 297            |
| <b>FINAL SET</b>      | <b>316,036</b> |

rate of 97.6% in EIRA-2). A subset of the samples genotyped as part of the Illumina GWA scan (NARAC: n=405 cases, 133 controls; EIRA: n=588 cases, 603 controls) was re-genotyped using Sequenom. We observed 99.605% concordance between the Illumina and Sequenom genotype platforms (NARAC) and 99.722% in EIRA. A total of 4 tagging SNPs from the *TRAF1-C5* locus (rs10985095, rs12338903, rs10985097, rs2900180) were

genotyped by Sequenom iPLEX Gold in both the EIRA-1 and EIRA-2 sets, as these SNPs were not on the HumanHap300 array.

### **Statistical analysis in NARAC-1 and EIRA-1.**

Prior to combining the NARAC-1 and EIRA-1 datasets, we first conducted an association study in each collection separately. We present our statistical methods here; results for specific SNPs are shown in Supplemental Table 1.

*Statistical analysis in NARAC-1.* We conducted a genomewide association study of SNP allele frequency by affected status using unrelated case-control samples. Prior to any correction for population stratification, the inflation factor parameter  $\lambda=1.43$  (standard Pearson's chi-square test for contingency tables). To correct for population stratification, we first removed genetic outliers, as described above, and then applied two distinct methods, a structured association method within homogenous clusters (Cochran-Mantel-Haenszel (CMH) meta-analysis implemented in PLINK)<sup>23</sup>, and a principal components method (implemented in EIGENSTRAT<sup>22</sup>). For the former, clusters were based on IBS methods (PLINK command line options: --ppc 0.05, --cc). Based on these constraints, 10 cases and 14 controls formed individual clusters, and were thus removed from downstream analysis. The association test was conducted within each cluster, and combined using Cochran-Mantel-Haenszel meta-analysis. We observed modest inflation ( $\lambda_{GC} = 1.20$ ) after implementing this method. We applied this  $\lambda_{GC}$  correction to the chi-square value of each SNP to arrive at a final p-value for association. Limiting analysis to 148, 262 with no missing genotype data only reduced  $\lambda_{GC}$  to 1.17, indicating that genotyping artifact (as estimated by missing data) was not a major contributing factor to inflation in our study.

In our analysis with EIGENSTRAT, we first removed additional outliers (sigma 6.0, 5 iterations; n=7 individuals removed), and corrected along the top 3 statistically significant principal components that correlated with presumed population ancestry using all SNPs and samples that passed our QC criteria. We noted that the 3<sup>rd</sup> and 4<sup>th</sup> eigenvector localized to a region on chromosome 8p23 with a known inversion polymorphism<sup>48</sup>, as all 854 SNPs correlated (>6 SD from the mean) with these two eigenvectors localized to a 3.8 Mb region on 8p23. For the purpose of our analysis, we excluded SNPs from this region when determining eigenvectors. We also excluded SNPs within the MHC region when determining eigenvectors, to avoid bias that may be introduced by the strong association to RA susceptibility attributable to this region. To calculate the correlation and statistical significance of specific SNPs to each eigenvector, we performed simple linear regression (Pearson's r) for each eigenvector coordinate x individual genotype in control samples using the R statistical software package ([www.r-project.org](http://www.r-project.org)).

Graphical representation of individuals along the top three principal components demonstrated that while the majority of cases and controls overlap, an excess number of controls were found within certain coordinates in principal component space. This observation is consistent with population substructure within individuals of European

ancestry. Correcting along the top 3 principal components decreases  $\lambda_{GC}$  from 1.43 to 1.04. We corrected for residual inflation in the structured association method by dividing chi-square values by  $\lambda_{GC}$ . SNPs linked to the lactase (*LCT*) persistence allele, whose frequency is known to vary greatly across European subgroups<sup>49</sup>, are no longer significant in analysis of case-control status after implementing CMH or EIGENSTRAT. Thus,  $\lambda_{GC}$  inflation in the NARAC-1 study was likely due to population stratification, but we were able to correct for it using CMH or EIGENSTRAT.

*Statistical analysis in EIRA-1.* We implemented the same two methods to correct for population stratification in analysis of the EIRA-1 data. Prior to any attempt to correct for stratification (including removal of genetic outliers), we observed  $\lambda_{GC} = 1.075$  for 315,967 SNPs that passed our initial QC filters. After removing outliers, as described above,  $\lambda_{GC}$  decreased to 1.057. We generated IBS clusters, using the identical methods as described for NARAC, and  $\lambda_{GC}$  decreased to 1.034.

We implemented EIGENSTRAT on the same set of samples used in our CMH analysis. We first removed additional outliers (sigma 6.0, 5 iterations; n=25 additional individuals removed), and corrected along the top principal component. We observed a decrease in  $\lambda_{GC}$  from 1.051 to 1.022 after EIGENSTRAT correction.

*Combined NARAC-1 and EIRA-1 analysis.* Association analysis in the 297,086 SNPs in 1,522 cases and 1,850 controls using Pearson's chi-square test for contingency tables yielded  $\lambda_{GC} = 1.41$ . We used the IBS clusters generated in NARAC-1 and EIRA-1 in our combined analysis, as described above. Consequently, the NARAC cases were clustered with NARAC controls, and the EIRA cases were clustered with EIRA controls, and the association statistics combined across clusters with CMH (as implemented in PLINK). There were a total of 397 case-control clusters, although 24 NARAC samples and 18 EIRA samples failed to cluster with another sample (IBS singletons). We observed  $\lambda_{GC} = 1.14$  in this analysis ( $\lambda_{GC} = 1.13$  after removing SNPs across the extended MHC region). We use CMH as our primary analysis, and all *P*-values reported have been corrected for residual inflation by  $\lambda_{GC}$ .

As a secondary analysis of the combined NARAC-1 and EIRA-1 dataset, we ran EIGENSTRAT, as described above. We removed additional outliers with the identical methods (sigma 6.0, 5 iterations); n=12 EIRA samples and 5 NARAC samples were removed. Based on our analysis in NARAC-1 and EIRA-1, we corrected along the 5 top principal components, and observed  $\lambda_{GC}$  decrease from 1.40 to 1.086; correcting along the top 10 principal components had little effect on  $\lambda_{GC}$  (1.076). We report our EIGENSTRAT results in Supplemental Table 1, and a Q-Q plot in Supplemental Figure 1.

## **Combining results obtained from Stages 1 and 2**

Results were combined across all samples (NARAC-1, NARAC-2, EIRA-1, EIRA-2) in three ways. First, we calculated a *P*-value and odds ratio based on allele counts using a Mantel-Haenszel (MH) method, fixed-effects model ( $P=0.10$  for heterogeneity across the

four sample collections for rs3761847) in the statistical package R. Second, we combined P-values obtained from structured association within the NARAC-EIRA genome scan (IBS CMH) with P-values obtained using 2-by-2 contingency tables of allele frequencies in our replication samples (NARAC-2 and EIRA-2) using Fisher's method. Not all replication SNPs were genotyped in the original GWA scan in EIRA, preventing us from performing this method of combining results for all 9 tag SNPs. Third, we combined all genotype data from NARAC-1, -2 and EIRA-1, -2 to conduct an omnibus (or global) test of haplotypes defined by 9 tag SNPs, and to conduct logistic regression analysis conditional on each SNP. These analyses were performed with statistical software package WHAP<sup>37</sup>. The final p-value and odds ratio we report in the abstract and in Figure 2 are based on Mantel-Haenszel method of combining allele counts.

### **Combining results with WTCCC**

The WTCCC recently reported “moderate” evidence of association for 11 non-MHC SNPs. To determine if these 11 SNPs, which were genotyped as part of the Affymetrix 500K array, had evidence of association in the combined NARAC-EIRA genomewide association study, we identified the best Illumina SNP-proxy for each of the 11 SNPs based on  $r^2$  with CEU HapMap. We report association statistics, together with  $r^2$  between the Affymetrix and Illumina SNPs in CEU HapMap, in Supplemental Table 3.

Supplemental Table 1A: SNPs with  $P < 0.0001$  (non MHC). We provide results from analysis with structured association (CMH) and principal components (EIGENSTRAT). All p values have been corrected for residual inflation by  $\lambda_{GC}$  (corr). We also report results from a similar analysis in NARAC alone and EIRA alone.

Supplemental Table 1B: SNPs with  $p < 0.0001$  (including MHC). The chi-square (CHISQ) statistic is from CMH and corrected for residual inflation by  $\lambda_{GC}$  (corr). The P value is derived from the corrected chi square. The allele frequency in cases (affected) and controls (unaffected) is reported as F\_A and F\_U, respectively. The odds ratio (OR) is calculated from CMH.

Supplemental Table 2: Ethnicity Questionnaire used for NARAC.

Supplemental Table 3: WTCCC SNPs in NARAC-1 and EIRA-1

Supplementary Figure 1: Q-Q plot of combined NARAC and EIRA analysis using EIGENSTRAT.

# Supplemental Tables 1A and 1B

Table 1A

| CHR      | SNP              | POS              | GENE                 | CHISQ_CMH_corr | P_CMH_corr   | F_A          | F_U          | OR_CMH      | CHISQ_EIGEN_corr | P_EIGEN_corr | P_NARAC_CMH_corr | P_NARAC_eigen_corr | P_EIRA_CMH_corr | P_EIRA_eigen_corr |
|----------|------------------|------------------|----------------------|----------------|--------------|--------------|--------------|-------------|------------------|--------------|------------------|--------------------|-----------------|-------------------|
| 1        | rs6429822        | 14087653         | PRDM2                | 15.4           | 9E-05        | 0.131        | 0.167        | 0.74        | 16.3             | 5E-05        | 2E-04            | 1E-03              | 1E-01           | 8E-02             |
| 1        | rs593461         | 35378870         | ZMYM4                | 18.2           | 2E-05        | 0.050        | 0.026        | 1.85        | 16.4             | 5E-05        | 5E-03            | 2E-02              | 1E-03           | 2E-04             |
| 1        | rs953035         | 35748601         | PSMB2                | 15.1           | 1E-04        | 0.054        | 0.029        | 1.71        | 18.4             | 2E-05        | 4E-02            | 5E-02              | 5E-04           | 4E-05             |
| 1        | rs883220         | 38285964         | FHL3-UTP11L-POU3F1   | 15.4           | 9E-05        | 0.211        | 0.253        | 0.78        | 9.7              | 2E-03        | 3E-03            | 8E-03              | 1E-02           | 5E-02             |
| 1        | rs4839335        | 113945913        | PTPN22               | 16.7           | 4E-05        | 0.293        | 0.245        | 1.29        | 16.1             | 6E-05        | 1E-03            | 1E-02              | 1E-02           | 2E-03             |
| 1        | rs1230647        | 113965681        | PTPN22               | 16.5           | 5E-05        | 0.292        | 0.244        | 1.28        | 15.8             | 7E-05        | 1E-03            | 9E-03              | 2E-02           | 2E-03             |
| 1        | rs2797409        | 114042244        | PTPN22               | 17.2           | 3E-05        | 0.293        | 0.245        | 1.29        | 16.4             | 5E-05        | 9E-04            | 9E-03              | 1E-02           | 2E-03             |
| <b>1</b> | <b>rs2476601</b> | <b>114089610</b> | <b>PTPN22</b>        | <b>44.9</b>    | <b>2E-11</b> | <b>0.162</b> | <b>0.097</b> | <b>1.72</b> | <b>38.2</b>      | <b>6E-10</b> | <b>4E-09</b>     | <b>2E-08</b>       | <b>5E-04</b>    | <b>2E-04</b>      |
| 1        | rs1217407        | 114105790        | PTPN22               | 16.5           | 5E-05        | 0.291        | 0.244        | 1.29        | 15.7             | 7E-05        | 1E-03            | 1E-02              | 1E-02           | 2E-03             |
| 2        | rs3768984        | 101009505        | NPAS2                | 15.6           | 8E-05        | 0.210        | 0.263        | 0.77        | 15.1             | 1E-04        | 6E-04            | 2E-04              | 4E-02           | 3E-02             |
| 3        | rs10510852       | 60591830         | FHIT                 | 16.2           | 6E-05        | 0.214        | 0.253        | 0.77        | 13.9             | 2E-04        | 1E-03            | 8E-03              | 2E-02           | 1E-01             |
| 4        | rs3924900        | 47390633         | ATP10D               | 17.1           | 3E-05        | 0.190        | 0.232        | 0.76        | 17.5             | 3E-05        | 2E-03            | 3E-03              | 7E-03           | 2E-02             |
| 4        | rs6838613        | 48317467         | SLC10A4              | 15.2           | 1E-04        | 0.430        | 0.485        | 0.81        | 14.4             | 2E-04        | 2E-04            | 1E-03              | 1E-01           | 7E-02             |
| 4        | rs13145689       | 111466624        | ELOVL6               | 15.9           | 7E-05        | 0.339        | 0.288        | 1.26        | 14.5             | 1E-04        | 8E-05            | 7E-04              | 1E-01           | 1E-01             |
| 4        | rs10516614       | 123331298        | TRPC3-FSA            | 15.3           | 9E-05        | 0.049        | 0.070        | 0.63        | 9.8              | 2E-03        | 1E-04            | 3E-03              | 2E-01           | 5E-01             |
| 4        | rs1490568        | 157760127        | none                 | 17.1           | 4E-05        | 0.521        | 0.459        | 1.25        | 14.4             | 2E-04        | 3E-05            | 1E-05              | 2E-01           | 2E-01             |
| 6        | rs4715102        | 9645597          | MRDS1                | 16.0           | 6E-05        | 0.343        | 0.395        | 0.80        | 16.9             | 4E-05        | 1E-02            | 2E-02              | 7E-04           | 1E-03             |
| 6        | rs9349607        | 9675327          | MRDS1                | 15.4           | 9E-05        | 0.363        | 0.413        | 0.80        | 17.5             | 3E-05        | 6E-03            | 1E-02              | 4E-03           | 6E-03             |
| 6        | rs9296264        | 38908879         | DNAH8                | 17.1           | 3E-05        | 0.271        | 0.317        | 0.78        | 15.0             | 1E-04        | 1E-03            | 1E-02              | 1E-02           | 1E-02             |
| 9        | rs1412224        | 81421590         | TLE1                 | 16.4           | 5E-05        | 0.292        | 0.242        | 1.28        | 16.3             | 5E-05        | 4E-04            | 2E-04              | 4E-02           | 8E-02             |
| 9        | rs1953126        | 120720054        | TRAF1-C5             | 26.8           | 2E-07        | 0.404        | 0.332        | 1.34        | 23.2             | 1E-06        | 1E-06            | 6E-06              | 3E-02           | 2E-02             |
| 9        | rs10985073       | 120723409        | TRAF1-C5             | 27.9           | 1E-07        | 0.491        | 0.414        | 1.34        | 24.7             | 7E-07        | 5E-06            | 2E-05              | 6E-03           | 4E-03             |
| 9        | rs881375         | 120732452        | TRAF1-C5             | 28.3           | 1E-07        | 0.408        | 0.333        | 1.35        | 24.1             | 9E-07        | 8E-07            | 5E-06              | 2E-02           | 1E-02             |
| <b>9</b> | <b>rs3761847</b> | <b>120769793</b> | <b>TRAF1-C5</b>      | <b>30.8</b>    | <b>3E-08</b> | <b>0.487</b> | <b>0.407</b> | <b>1.36</b> | <b>27.0</b>      | <b>2E-07</b> | <b>1E-06</b>     | <b>4E-06</b>       | <b>5E-03</b>    | <b>4E-03</b>      |
| 9        | rs7026551        | 120812687        | TRAF1-C5             | 22.5           | 2E-06        | 0.238        | 0.181        | 1.37        | 20.5             | 6E-06        | 1E-03            | 1E-03              | 3E-04           | 2E-04             |
| 9        | rs2269066        | 120816572        | TRAF1-C5             | 17.9           | 2E-05        | 0.131        | 0.094        | 1.44        | 14.4             | 1E-04        | 9E-03            | 2E-02              | 4E-04           | 8E-04             |
| 9        | rs7037673        | 120820038        | TRAF1-C5             | 20.3           | 7E-06        | 0.380        | 0.444        | 0.78        | 20.4             | 6E-06        | 3E-04            | 7E-04              | 8E-03           | 4E-03             |
| 9        | rs2416810        | 120864754        | TRAF1-C5             | 15.7           | 7E-05        | 0.213        | 0.167        | 1.31        | 13.6             | 2E-04        | 2E-03            | 2E-03              | 2E-02           | 9E-03             |
| 10       | rs1913517        | 49789060         | LRRC18               | 18.1           | 2E-05        | 0.408        | 0.475        | 0.79        | 12.3             | 4E-04        | 2E-04            | 3E-05              | 3E-02           | 4E-02             |
| 10       | rs12252317       | 64316874         | EGR2                 | 19.3           | 1E-05        | 0.086        | 0.059        | 1.60        | 20.7             | 5E-06        | 6E-05            | 9E-04              | 5E-02           | 4E-02             |
| 10       | rs7068751        | 64367154         | EGR2                 | 17.1           | 4E-05        | 0.083        | 0.058        | 1.56        | 19.8             | 9E-06        | 1E-04            | 2E-03              | 8E-02           | 5E-02             |
| 10       | rs2935689        | 123476616        | ATE1                 | 17.7           | 3E-05        | 0.165        | 0.123        | 1.38        | 13.8             | 2E-04        | 6E-05            | 3E-04              | 7E-02           | 5E-02             |
| 10       | rs4271313        | 134773476        | GPR123               | 18.1           | 2E-05        | 0.484        | 0.430        | 1.26        | 14.8             | 1E-04        | 3E-04            | 9E-04              | 2E-02           | 7E-02             |
| 11       | rs2714078        | 122875449        | CR599196-GRAMD1B     | 16.4           | 5E-05        | 0.278        | 0.319        | 0.79        | 13.8             | 2E-04        | 9E-05            | 8E-03              | 1E-01           | 9E-02             |
| 12       | rs941152         | 130516217        | LOC338797-SFRS8      | 17.6           | 3E-05        | 0.273        | 0.336        | 0.78        | 14.9             | 1E-04        | 2E-03            | 7E-04              | 5E-03           | 9E-03             |
| 14       | rs12885166       | 92195035         | RIN3                 | 15.5           | 8E-05        | 0.373        | 0.316        | 1.25        | 12.4             | 4E-04        | 3E-05            | 4E-05              | 3E-01           | 4E-01             |
| 14       | rs11160325       | 95808257         | BDKRB1               | 16.5           | 5E-05        | 0.520        | 0.463        | 1.24        | 12.6             | 4E-04        | 1E-03            | 3E-03              | 1E-02           | 1E-02             |
| 14       | rs945034         | 95809627         | BDKRB1               | 19.5           | 1E-05        | 0.461        | 0.398        | 1.27        | 16.1             | 6E-05        | 3E-04            | 8E-04              | 1E-02           | 7E-03             |
| 14       | rs11851852       | 104239473        | C14orf151            | 15.5           | 8E-05        | 0.055        | 0.084        | 0.64        | 14.8             | 1E-04        | 2E-05            | 1E-04              | 3E-01           | 3E-01             |
| 15       | rs11852946       | 36975713         | FLJ35695             | 18.1           | 2E-05        | 0.074        | 0.109        | 0.66        | 20.1             | 7E-06        | 4E-04            | 2E-04              | 1E-02           | 2E-02             |
| 16       | rs4924           | 54953987         | AMFR                 | 15.2           | 1E-04        | 0.446        | 0.491        | 0.81        | 17.3             | 3E-05        | 2E-05            | 7E-04              | 4E-01           | 5E-01             |
| 16       | rs2440468        | 54978095         | AMFR                 | 15.7           | 7E-05        | 0.446        | 0.490        | 0.81        | 17.2             | 3E-05        | 2E-05            | 8E-04              | 3E-01           | 5E-01             |
| 17       | rs212470         | 29748906         | 17q cytokine cluster | 17.0           | 4E-05        | 0.268        | 0.213        | 1.30        | 18.2             | 2E-05        | 5E-03            | 2E-03              | 2E-03           | 2E-03             |
| 17       | rs8069038        | 59564896         | ERN1-TEX2            | 16.3           | 5E-05        | 0.048        | 0.071        | 0.62        | 17.3             | 3E-05        | 4E-04            | 9E-03              | 3E-02           | 2E-02             |
| 17       | rs3924958        | 68157041         | SLC39A11             | 15.5           | 8E-05        | 0.082        | 0.109        | 0.70        | 15.4             | 9E-05        | 2E-02            | 7E-02              | 5E-04           | 9E-04             |
| 19       | rs8104309        | 36858686         | none                 | 15.1           | 1E-04        | 0.184        | 0.142        | 1.33        | 13.1             | 3E-04        | 6E-05            | 2E-05              | 2E-01           | 3E-01             |
| 20       | rs6074022        | 44173603         | CD40                 | 21.5           | 4E-06        | 0.216        | 0.269        | 0.74        | 18.9             | 1E-05        | 7E-04            | 2E-03              | 1E-03           | 3E-03             |
| 20       | rs1569723        | 44175471         | CD40                 | 22.0           | 3E-06        | 0.215        | 0.270        | 0.74        | 20.1             | 8E-06        | 5E-04            | 1E-03              | 1E-03           | 3E-03             |
| 20       | rs4811846        | 55430874         | RBM38                | 16.0           | 6E-05        | 0.342        | 0.290        | 1.26        | 13.7             | 2E-04        | 6E-04            | 2E-03              | 3E-02           | 4E-02             |
| 20       | rs1182531        | 57826397         | PHACTR3              | 21.1           | 4E-06        | 0.154        | 0.205        | 0.72        | 19.3             | 1E-05        | 4E-07            | 2E-06              | 4E-01           | 3E-01             |

**Table  
1B**

| <b>CHR</b> | <b>SNP</b> | <b>POS</b> | <b>CHISQP</b> | <b>F_A</b> | <b>F_U</b> | <b>OR</b> |      |
|------------|------------|------------|---------------|------------|------------|-----------|------|
| 1          | rs6429822  | 14087653   | 15.4          | 9E-05      | 0.131      | 0.167     | 0.74 |
| 1          | rs593461   | 35378870   | 18.2          | 2E-05      | 0.050      | 0.026     | 1.85 |
| 1          | rs953035   | 35748601   | 15.1          | 1E-04      | 0.054      | 0.029     | 1.71 |
| 1          | rs883220   | 38285964   | 15.4          | 9E-05      | 0.211      | 0.253     | 0.78 |
| 1          | rs4839335  | 113945913  | 16.7          | 4E-05      | 0.293      | 0.245     | 1.29 |
| 1          | rs1230647  | 113965681  | 16.5          | 5E-05      | 0.292      | 0.244     | 1.28 |
| 1          | rs2797409  | 114042244  | 17.2          | 3E-05      | 0.293      | 0.245     | 1.29 |
| 1          | rs2476601  | 114089610  | 44.9          | 2E-11      | 0.162      | 0.097     | 1.72 |
| 1          | rs1217407  | 114105790  | 16.5          | 5E-05      | 0.291      | 0.244     | 1.29 |
| 2          | rs3768984  | 101009505  | 15.6          | 8E-05      | 0.210      | 0.263     | 0.77 |
| 3          | rs10510852 | 60591830   | 16.2          | 6E-05      | 0.214      | 0.253     | 0.77 |
| 4          | rs3924900  | 47390633   | 17.1          | 3E-05      | 0.190      | 0.232     | 0.76 |
| 4          | rs6838613  | 48317467   | 15.2          | 1E-04      | 0.430      | 0.485     | 0.81 |
| 4          | rs13145689 | 111466624  | 15.9          | 7E-05      | 0.339      | 0.288     | 1.26 |
| 4          | rs10516614 | 123331298  | 15.3          | 9E-05      | 0.049      | 0.070     | 0.63 |
| 4          | rs1490568  | 157760127  | 17.1          | 4E-05      | 0.521      | 0.459     | 1.25 |
| 6          | rs4715102  | 9645597    | 16.0          | 6E-05      | 0.343      | 0.395     | 0.80 |
| 6          | rs9349607  | 9675327    | 15.4          | 9E-05      | 0.363      | 0.413     | 0.80 |
| 6          | rs3763338  | 29002290   | 19.8          | 9E-06      | 0.107      | 0.073     | 1.53 |
| 6          | rs2071788  | 29020286   | 15.4          | 9E-05      | 0.099      | 0.071     | 1.47 |
| 6          | rs9295794  | 29212914   | 15.2          | 1E-04      | 0.099      | 0.069     | 1.47 |
| 6          | rs4713211  | 29444033   | 18.6          | 2E-05      | 0.267      | 0.322     | 0.77 |
| 6          | rs2747457  | 29764396   | 15.8          | 7E-05      | 0.192      | 0.235     | 0.77 |
| 6          | rs3131888  | 29771868   | 30.1          | 4E-08      | 0.338      | 0.417     | 0.73 |
| 6          | rs7776082  | 29775252   | 20.8          | 5E-06      | 0.372      | 0.438     | 0.78 |
| 6          | rs2523399  | 29808058   | 16.6          | 5E-05      | 0.398      | 0.447     | 0.80 |
| 6          | rs2394160  | 29811241   | 17.5          | 3E-05      | 0.487      | 0.432     | 1.26 |
| 6          | rs1737078  | 29832918   | 20.2          | 7E-06      | 0.389      | 0.453     | 0.78 |
| 6          | rs1611185  | 29876323   | 20.0          | 8E-06      | 0.471      | 0.404     | 1.28 |
| 6          | rs1736971  | 29884301   | 17.1          | 4E-05      | 0.239      | 0.290     | 0.77 |
| 6          | rs1632948  | 29902028   | 31.4          | 2E-08      | 0.410      | 0.499     | 0.73 |
| 6          | rs1611133  | 29917361   | 21.1          | 4E-06      | 0.185      | 0.239     | 0.73 |
| 6          | rs2734985  | 29926641   | 20.3          | 7E-06      | 0.180      | 0.230     | 0.73 |
| 6          | rs2517861  | 29929961   | 17.3          | 3E-05      | 0.191      | 0.238     | 0.76 |
| 6          | rs2975033  | 29930240   | 34.8          | 4E-09      | 0.378      | 0.292     | 1.41 |
| 6          | rs1611710  | 29936895   | 34.0          | 5E-09      | 0.346      | 0.430     | 0.72 |
| 6          | rs1611732  | 29938987   | 33.4          | 7E-09      | 0.347      | 0.430     | 0.72 |



|             |          |      |       |       |       |      |
|-------------|----------|------|-------|-------|-------|------|
| 6rs3893464  | 30043229 | 15.8 | 7E-05 | 0.401 | 0.461 | 0.80 |
| 6rs2256543  | 30045812 | 20.9 | 5E-06 | 0.378 | 0.437 | 0.78 |
| 6rs2523946  | 30049922 | 41.0 | 1E-10 | 0.534 | 0.444 | 1.42 |
| 6rs6904029  | 30051046 | 36.4 | 2E-09 | 0.375 | 0.290 | 1.42 |
| 6rs166327   | 30110860 | 20.1 | 7E-06 | 0.370 | 0.437 | 0.78 |
| 6rs4711207  | 30113733 | 38.6 | 5E-10 | 0.368 | 0.277 | 1.45 |
| 6rs3807031  | 30141863 | 44.3 | 3E-11 | 0.292 | 0.208 | 1.52 |
| 6rs1150735  | 30153178 | 19.0 | 1E-05 | 0.319 | 0.374 | 0.78 |
| 6rs6909253  | 30163622 | 31.7 | 2E-08 | 0.513 | 0.428 | 1.36 |
| 6rs3132680  | 30181174 | 41.5 | 1E-10 | 0.426 | 0.335 | 1.44 |
| 6rs2844795  | 30181826 | 21.0 | 5E-06 | 0.538 | 0.465 | 1.28 |
| 6rs2523990  | 30185208 | 21.3 | 4E-06 | 0.380 | 0.450 | 0.77 |
| 6rs4959041  | 30185946 | 35.5 | 2E-09 | 0.384 | 0.303 | 1.41 |
| 6rs757262   | 30222934 | 55.0 | 1E-13 | 0.333 | 0.235 | 1.57 |
| 6rs757259   | 30223521 | 55.3 | 1E-13 | 0.333 | 0.235 | 1.57 |
| 6rs2022065  | 30229439 | 31.3 | 2E-08 | 0.389 | 0.313 | 1.38 |
| 6rs9261535  | 30235302 | 59.2 | 1E-14 | 0.338 | 0.236 | 1.59 |
| 6rs929156   | 30247678 | 46.9 | 8E-12 | 0.345 | 0.254 | 1.51 |
| 6rs2844786  | 30252399 | 39.6 | 3E-10 | 0.374 | 0.292 | 1.44 |
| 6rs4711211  | 30270788 | 58.3 | 2E-14 | 0.339 | 0.238 | 1.58 |
| 6rs3129690  | 30304834 | 15.1 | 1E-04 | 0.503 | 0.448 | 1.24 |
| 6rs2844779  | 30313386 | 36.4 | 2E-09 | 0.372 | 0.295 | 1.42 |
| 6rs928822   | 30383225 | 31.2 | 2E-08 | 0.501 | 0.420 | 1.36 |
| 6rs3094054  | 30441484 | 15.4 | 9E-05 | 0.079 | 0.106 | 0.68 |
| 6rs1034323  | 30476614 | 40.9 | 2E-10 | 0.482 | 0.400 | 1.42 |
| 6rs7741364  | 30480549 | 38.6 | 5E-10 | 0.433 | 0.353 | 1.42 |
| 6rs1076832  | 30527810 | 48.4 | 3E-12 | 0.234 | 0.156 | 1.62 |
| 6rs2844729  | 30530611 | 17.2 | 3E-05 | 0.453 | 0.398 | 1.26 |
| 6rs6930977  | 30543267 | 47.4 | 6E-12 | 0.229 | 0.153 | 1.62 |
| 6rs2844713  | 30627237 | 24.1 | 9E-07 | 0.405 | 0.338 | 1.32 |
| 6rs1264432  | 30670000 | 30.8 | 3E-08 | 0.381 | 0.305 | 1.38 |
| 6rs1140809  | 30719655 | 61.4 | 5E-15 | 0.397 | 0.513 | 0.65 |
| 6rs1076828  | 30736231 | 35.7 | 2E-09 | 0.281 | 0.355 | 0.70 |
| 6rs1075496  | 30766218 | 21.4 | 4E-06 | 0.368 | 0.435 | 0.77 |
| 6rs12210947 | 30843084 | 28.6 | 9E-08 | 0.231 | 0.165 | 1.44 |
| 6rs4711235  | 30876615 | 16.2 | 6E-05 | 0.355 | 0.297 | 1.26 |
| 6rs2894046  | 30890084 | 17.7 | 3E-05 | 0.364 | 0.304 | 1.28 |
| 6rs2394412  | 30890214 | 17.5 | 3E-05 | 0.364 | 0.304 | 1.27 |
| 6rs4713391  | 30900214 | 53.0 | 3E-13 | 0.221 | 0.135 | 1.68 |
| 6rs12192704 | 30900249 | 51.7 | 6E-13 | 0.219 | 0.134 | 1.67 |
| 6rs1264344  | 30908556 | 32.6 | 1E-08 | 0.515 | 0.441 | 1.37 |
| 6rs3095352  | 30913900 | 18.7 | 2E-05 | 0.381 | 0.437 | 0.79 |

|            |          |      |       |       |       |      |
|------------|----------|------|-------|-------|-------|------|
| 6rs2844654 | 30946667 | 42.2 | 8E-11 | 0.439 | 0.352 | 1.44 |
| 6rs1264333 | 30952293 | 42.3 | 8E-11 | 0.439 | 0.352 | 1.44 |
| 6rs1264303 | 30990492 | 42.8 | 6E-11 | 0.440 | 0.352 | 1.44 |
| 6rs1264302 | 30990613 | 36.6 | 1E-09 | 0.433 | 0.351 | 1.41 |
| 6rs2074506 | 30998462 | 43.9 | 4E-11 | 0.440 | 0.352 | 1.45 |
| 6rs753725  | 30998850 | 37.0 | 1E-09 | 0.391 | 0.472 | 0.72 |
| 6rs2532934 | 31002738 | 35.1 | 3E-09 | 0.395 | 0.474 | 0.72 |
| 6rs2240804 | 31028869 | 42.0 | 9E-11 | 0.440 | 0.349 | 1.45 |
| 6rs3095089 | 31041773 | 16.4 | 5E-05 | 0.138 | 0.177 | 0.73 |
| 6rs1634717 | 31080568 | 20.8 | 5E-06 | 0.362 | 0.431 | 0.78 |
| 6rs2523897 | 31101937 | 17.8 | 2E-05 | 0.122 | 0.164 | 0.71 |
| 6rs6933349 | 31109992 | 22.8 | 2E-06 | 0.257 | 0.194 | 1.37 |
| 6rs4248154 | 31110595 | 30.4 | 3E-08 | 0.245 | 0.178 | 1.45 |
| 6rs2523849 | 31133030 | 23.0 | 2E-06 | 0.104 | 0.157 | 0.67 |
| 6rs2428514 | 31135495 | 20.3 | 7E-06 | 0.073 | 0.113 | 0.64 |
| 6rs2517403 | 31174988 | 19.4 | 1E-05 | 0.282 | 0.346 | 0.77 |
| 6rs2844635 | 31183460 | 19.3 | 1E-05 | 0.283 | 0.346 | 0.77 |
| 6rs1265048 | 31189388 | 23.4 | 1E-06 | 0.412 | 0.347 | 1.31 |
| 6rs3815087 | 31201566 | 19.4 | 1E-05 | 0.136 | 0.188 | 0.72 |
| 6rs3130559 | 31205280 | 24.0 | 1E-06 | 0.268 | 0.208 | 1.37 |
| 6rs1966    | 31215712 | 29.9 | 5E-08 | 0.261 | 0.189 | 1.42 |
| 6rs130067  | 31226490 | 29.1 | 7E-08 | 0.261 | 0.189 | 1.42 |
| 6rs1265110 | 31227401 | 34.5 | 4E-09 | 0.178 | 0.112 | 1.58 |
| 6rs3130933 | 31240064 | 16.8 | 4E-05 | 0.112 | 0.141 | 0.71 |
| 6rs3868542 | 31253818 | 22.5 | 2E-06 | 0.448 | 0.378 | 1.30 |
| 6rs9295957 | 31265572 | 51.9 | 6E-13 | 0.262 | 0.168 | 1.62 |
| 6rs4713447 | 31270942 | 22.6 | 2E-06 | 0.466 | 0.401 | 1.30 |
| 6rs3094609 | 31273545 | 18.0 | 2E-05 | 0.124 | 0.155 | 0.72 |
| 6rs3868075 | 31275794 | 22.4 | 2E-06 | 0.466 | 0.401 | 1.30 |
| 6rs4122189 | 31275906 | 28.4 | 1E-07 | 0.289 | 0.217 | 1.40 |
| 6rs3869109 | 31292175 | 40.5 | 2E-10 | 0.355 | 0.435 | 0.70 |
| 6rs7745906 | 31311987 | 51.5 | 7E-13 | 0.244 | 0.154 | 1.63 |
| 6rs2074488 | 31348410 | 81.5 | 2E-19 | 0.235 | 0.128 | 1.90 |
| 6rs7382297 | 31355046 | 18.1 | 2E-05 | 0.121 | 0.153 | 0.71 |
| 6rs2243868 | 31369255 | 43.5 | 4E-11 | 0.331 | 0.414 | 0.69 |
| 6rs3873379 | 31370148 | 30.5 | 3E-08 | 0.352 | 0.283 | 1.38 |
| 6rs2524089 | 31374501 | 43.4 | 4E-11 | 0.330 | 0.413 | 0.69 |
| 6rs9366778 | 31377152 | 23.3 | 1E-06 | 0.447 | 0.387 | 1.31 |
| 6rs6457374 | 31380240 | 23.1 | 2E-06 | 0.226 | 0.270 | 0.74 |
| 6rs3873386 | 31381724 | 43.9 | 3E-11 | 0.465 | 0.375 | 1.45 |
| 6rs2156875 | 31425326 | 35.1 | 3E-09 | 0.406 | 0.492 | 0.72 |
| 6rs2523619 | 31426123 | 23.6 | 1E-06 | 0.133 | 0.193 | 0.70 |

|            |          |       |       |       |       |      |
|------------|----------|-------|-------|-------|-------|------|
| 6rs2523589 | 31435313 | 28.5  | 1E-07 | 0.438 | 0.505 | 0.74 |
| 6rs2844575 | 31442924 | 20.0  | 8E-06 | 0.518 | 0.456 | 1.28 |
| 6rs2253907 | 31444849 | 29.6  | 5E-08 | 0.413 | 0.495 | 0.74 |
| 6rs2254556 | 31450610 | 22.5  | 2E-06 | 0.135 | 0.174 | 0.70 |
| 6rs9266722 | 31457901 | 40.7  | 2E-10 | 0.167 | 0.107 | 1.66 |
| 6rs2844533 | 31458781 | 40.1  | 2E-10 | 0.180 | 0.248 | 0.65 |
| 6rs2844529 | 31461572 | 15.2  | 1E-04 | 0.264 | 0.328 | 0.79 |
| 6rs2428486 | 31462083 | 15.2  | 1E-04 | 0.264 | 0.328 | 0.79 |
| 6rs2251396 | 31472686 | 39.2  | 4E-10 | 0.398 | 0.306 | 1.43 |
| 6rs2256028 | 31487177 | 15.9  | 7E-05 | 0.105 | 0.154 | 0.72 |
| 6rs2844513 | 31496193 | 30.1  | 4E-08 | 0.343 | 0.432 | 0.73 |
| 6rs2524279 | 31500885 | 70.8  | 4E-17 | 0.147 | 0.068 | 2.12 |
| 6rs2596480 | 31533964 | 27.8  | 1E-07 | 0.032 | 0.069 | 0.50 |
| 6rs2523674 | 31544768 | 42.6  | 7E-11 | 0.376 | 0.475 | 0.70 |
| 6rs2244839 | 31546347 | 27.9  | 1E-07 | 0.178 | 0.249 | 0.70 |
| 6rs1055569 | 31548061 | 18.3  | 2E-05 | 0.255 | 0.318 | 0.77 |
| 6rs2516440 | 31548476 | 15.6  | 8E-05 | 0.263 | 0.323 | 0.79 |
| 6rs2523467 | 31565557 | 16.2  | 6E-05 | 0.261 | 0.326 | 0.78 |
| 6rs3130922 | 31569068 | 16.1  | 6E-05 | 0.277 | 0.333 | 0.79 |
| 6rs2516398 | 31589505 | 25.1  | 5E-07 | 0.273 | 0.329 | 0.74 |
| 6rs2844494 | 31591394 | 19.3  | 1E-05 | 0.281 | 0.330 | 0.77 |
| 6rs3130637 | 31596124 | 17.5  | 3E-05 | 0.212 | 0.251 | 0.76 |
| 6rs3093993 | 31598704 | 18.1  | 2E-05 | 0.212 | 0.251 | 0.76 |
| 6rs3095227 | 31598979 | 17.3  | 3E-05 | 0.211 | 0.250 | 0.76 |
| 6rs2259435 | 31604894 | 19.3  | 1E-05 | 0.223 | 0.176 | 1.35 |
| 6rs2071596 | 31614670 | 21.1  | 4E-06 | 0.221 | 0.169 | 1.37 |
| 6rs2844509 | 31618903 | 57.0  | 4E-14 | 0.134 | 0.225 | 0.58 |
| 6rs2239705 | 31621381 | 15.8  | 7E-05 | 0.113 | 0.160 | 0.72 |
| 6rs6929796 | 31630648 | 21.6  | 3E-06 | 0.222 | 0.169 | 1.37 |
| 6rs2844484 | 31644203 | 21.5  | 4E-06 | 0.339 | 0.403 | 0.77 |
| 6rs2844482 | 31647746 | 19.8  | 8E-06 | 0.213 | 0.162 | 1.37 |
| 6rs3093662 | 31652168 | 27.4  | 2E-07 | 0.032 | 0.067 | 0.50 |
| 6rs2256965 | 31663109 | 22.4  | 2E-06 | 0.355 | 0.422 | 0.77 |
| 6rs2844480 | 31672800 | 16.4  | 5E-05 | 0.242 | 0.196 | 1.30 |
| 6rs2844479 | 31680935 | 60.3  | 8E-15 | 0.441 | 0.357 | 1.55 |
| 6rs2269475 | 31691910 | 42.5  | 7E-11 | 0.208 | 0.131 | 1.60 |
| 6rs2260000 | 31701455 | 59.2  | 1E-14 | 0.458 | 0.369 | 1.53 |
| 6rs3115663 | 31709822 | 41.3  | 1E-10 | 0.127 | 0.187 | 0.61 |
| 6rs2261033 | 31711570 | 163.4 | 2E-37 | 0.361 | 0.526 | 0.49 |
| 6rs9267522 | 31711749 | 40.6  | 2E-10 | 0.128 | 0.187 | 0.62 |
| 6rs3132453 | 31712023 | 19.3  | 1E-05 | 0.051 | 0.075 | 0.61 |
| 6rs1077393 | 31718508 | 29.4  | 6E-08 | 0.464 | 0.521 | 0.74 |

|             |          |       |       |       |       |      |
|-------------|----------|-------|-------|-------|-------|------|
| 6rs2844463  | 31723146 | 35.1  | 3E-09 | 0.069 | 0.124 | 0.56 |
| 6rs3130050  | 31726740 | 33.4  | 8E-09 | 0.102 | 0.146 | 0.62 |
| 6rs3117582  | 31728499 | 23.6  | 1E-06 | 0.080 | 0.116 | 0.64 |
| 6rs3130617  | 31735502 | 54.5  | 2E-13 | 0.178 | 0.255 | 0.61 |
| 6rs805262   | 31736712 | 22.7  | 2E-06 | 0.458 | 0.514 | 0.77 |
| 6rs3130618  | 31740113 | 41.0  | 2E-10 | 0.128 | 0.187 | 0.62 |
| 6rs2280800  | 31754377 | 43.0  | 5E-11 | 0.209 | 0.132 | 1.61 |
| 6rs9267546  | 31781415 | 20.9  | 5E-06 | 0.052 | 0.088 | 0.60 |
| 6rs2242653  | 31783744 | 37.7  | 8E-10 | 0.221 | 0.147 | 1.54 |
| 6rs3749952  | 31791136 | 16.0  | 6E-05 | 0.010 | 0.027 | 0.40 |
| 6rs3131379  | 31829012 | 22.0  | 3E-06 | 0.084 | 0.117 | 0.65 |
| 6rs707939   | 31834667 | 113.4 | 2E-26 | 0.486 | 0.355 | 1.81 |
| 6rs2075800  | 31885925 | 111.8 | 4E-26 | 0.469 | 0.340 | 1.81 |
| 6rs2227956  | 31886251 | 43.3  | 5E-11 | 0.124 | 0.178 | 0.60 |
| 6rs9267649  | 31932807 | 41.4  | 1E-10 | 0.123 | 0.176 | 0.61 |
| 6rs660550   | 31945256 | 34.7  | 4E-09 | 0.388 | 0.444 | 0.72 |
| 6rs644827   | 31946420 | 35.0  | 3E-09 | 0.387 | 0.443 | 0.72 |
| 6rs494620   | 31946692 | 84.6  | 4E-20 | 0.525 | 0.420 | 1.66 |
| 6rs2242665  | 31947288 | 34.1  | 5E-09 | 0.388 | 0.444 | 0.72 |
| 6rs2736428  | 31951903 | 100.0 | 2E-23 | 0.467 | 0.345 | 1.75 |
| 6rs9267658  | 31953964 | 36.4  | 2E-09 | 0.095 | 0.138 | 0.60 |
| 6rs652888   | 31959213 | 37.6  | 9E-10 | 0.154 | 0.212 | 0.65 |
| 6rs535586   | 31968316 | 77.1  | 2E-18 | 0.245 | 0.336 | 0.59 |
| 6rs659445   | 31972283 | 77.5  | 1E-18 | 0.246 | 0.337 | 0.59 |
| 6rs558702   | 31978305 | 21.5  | 4E-06 | 0.082 | 0.115 | 0.65 |
| 6rs2734335  | 32001923 | 98.6  | 3E-23 | 0.375 | 0.493 | 0.58 |
| 6rs1042663  | 32013109 | 72.5  | 2E-17 | 0.030 | 0.085 | 0.34 |
| 6rs550605   | 32015126 | 53.5  | 3E-13 | 0.039 | 0.088 | 0.43 |
| 6rs541862   | 32024930 | 55.5  | 9E-14 | 0.037 | 0.087 | 0.42 |
| 6rs4151657  | 32025519 | 109.5 | 1E-25 | 0.486 | 0.356 | 1.79 |
| 6rs1270942  | 32026839 | 24.6  | 7E-07 | 0.082 | 0.118 | 0.63 |
| 6rs2072633  | 32027557 | 159.1 | 2E-36 | 0.302 | 0.451 | 0.49 |
| 6rs4151672  | 32027809 | 16.4  | 5E-05 | 0.070 | 0.043 | 1.62 |
| 6rs438999   | 32036285 | 51.1  | 9E-13 | 0.039 | 0.088 | 0.44 |
| 6rs437179   | 32036993 | 73.6  | 1E-17 | 0.225 | 0.312 | 0.59 |
| 6rs406936   | 32041140 | 46.8  | 8E-12 | 0.066 | 0.122 | 0.52 |
| 6rs454212   | 32042351 | 46.6  | 9E-12 | 0.065 | 0.121 | 0.52 |
| 6rs389884   | 32048876 | 25.4  | 5E-07 | 0.081 | 0.117 | 0.63 |
| 6rs387608   | 32049536 | 45.1  | 2E-11 | 0.067 | 0.122 | 0.53 |
| 6rs6941112  | 32054593 | 97.4  | 6E-23 | 0.434 | 0.314 | 1.75 |
| 6rs389883   | 32055439 | 78.1  | 1E-18 | 0.220 | 0.311 | 0.57 |
| 6rs12333245 | 32127747 | 18.5  | 2E-05 | 0.061 | 0.095 | 0.64 |

|             |          |       |       |       |       |      |
|-------------|----------|-------|-------|-------|-------|------|
| 6rs12198173 | 32134786 | 21.2  | 4E-06 | 0.048 | 0.081 | 0.59 |
| 6rs2269429  | 32137161 | 27.0  | 2E-07 | 0.050 | 0.087 | 0.56 |
| 6rs2239689  | 32138262 | 141.7 | 1E-32 | 0.478 | 0.328 | 1.95 |
| 6rs2071295  | 32146678 | 143.3 | 5E-33 | 0.478 | 0.326 | 1.96 |
| 6rs185819   | 32158045 | 52.8  | 4E-13 | 0.409 | 0.496 | 0.67 |
| 6rs169496   | 32160961 | 17.7  | 3E-05 | 0.061 | 0.095 | 0.65 |
| 6rs204899   | 32165605 | 20.3  | 6E-06 | 0.058 | 0.093 | 0.62 |
| 6rs1150752  | 32172704 | 16.0  | 6E-05 | 0.077 | 0.106 | 0.68 |
| 6rs13199524 | 32174743 | 22.0  | 3E-06 | 0.046 | 0.079 | 0.58 |
| 6rs3134954  | 32179871 | 43.1  | 5E-11 | 0.099 | 0.150 | 0.58 |
| 6rs12153855 | 32182782 | 33.6  | 7E-09 | 0.052 | 0.096 | 0.53 |
| 6rs2269426  | 32184477 | 43.5  | 4E-11 | 0.462 | 0.384 | 1.44 |
| 6rs8111     | 32191153 | 99.4  | 2E-23 | 0.410 | 0.289 | 1.78 |
| 6rs3830076  | 32204222 | 80.8  | 2E-19 | 0.146 | 0.066 | 2.25 |
| 6rs204999   | 32217957 | 110.7 | 7E-26 | 0.149 | 0.266 | 0.48 |
| 6rs2269425  | 32231617 | 21.4  | 4E-06 | 0.197 | 0.141 | 1.40 |
| 6rs3134603  | 32233980 | 37.0  | 1E-09 | 0.090 | 0.139 | 0.59 |
| 6rs3096697  | 32242488 | 85.6  | 2E-20 | 0.119 | 0.209 | 0.49 |
| 6rs3134945  | 32254470 | 76.6  | 2E-18 | 0.127 | 0.213 | 0.52 |
| 6rs3134943  | 32255739 | 43.2  | 5E-11 | 0.092 | 0.143 | 0.57 |
| 6rs2070600  | 32259421 | 112.6 | 3E-26 | 0.131 | 0.047 | 2.87 |
| 6rs204994   | 32262976 | 87.0  | 1E-20 | 0.127 | 0.219 | 0.50 |
| 6rs204991   | 32269344 | 70.5  | 5E-17 | 0.116 | 0.197 | 0.52 |
| 6rs204990   | 32269408 | 74.2  | 7E-18 | 0.116 | 0.200 | 0.52 |
| 6rs2071277  | 32279661 | 17.6  | 3E-05 | 0.438 | 0.504 | 0.80 |
| 6rs3131296  | 32280971 | 45.6  | 1E-11 | 0.086 | 0.141 | 0.55 |
| 6rs2071286  | 32287874 | 18.3  | 2E-05 | 0.260 | 0.222 | 1.31 |
| 6rs206015   | 32290737 | 29.2  | 6E-08 | 0.157 | 0.110 | 1.54 |
| 6rs3132946  | 32298006 | 40.3  | 2E-10 | 0.090 | 0.135 | 0.58 |
| 6rs3830041  | 32299317 | 40.1  | 2E-10 | 0.033 | 0.077 | 0.45 |
| 6rs2267644  | 32300538 | 45.0  | 2E-11 | 0.084 | 0.041 | 2.15 |
| 6rs479536   | 32301656 | 55.3  | 1E-13 | 0.018 | 0.057 | 0.30 |
| 6rs404890   | 32306845 | 91.9  | 9E-22 | 0.269 | 0.407 | 0.57 |
| 6rs2849015  | 32306914 | 94.6  | 2E-22 | 0.270 | 0.409 | 0.57 |
| 6rs9267873  | 32307330 | 112.8 | 2E-26 | 0.569 | 0.402 | 1.79 |
| 6rs3130299  | 32311515 | 47.0  | 7E-12 | 0.157 | 0.248 | 0.62 |
| 6rs382259   | 32317005 | 64.6  | 9E-16 | 0.147 | 0.258 | 0.56 |
| 6rs3115573  | 32326821 | 115.5 | 6E-27 | 0.552 | 0.421 | 1.80 |
| 6rs9267992  | 32328375 | 56.4  | 6E-14 | 0.088 | 0.145 | 0.52 |
| 6rs3130315  | 32328663 | 115.8 | 5E-27 | 0.552 | 0.421 | 1.80 |
| 6rs3130320  | 32331236 | 175.6 | 4E-40 | 0.221 | 0.368 | 0.45 |
| 6rs3130340  | 32352605 | 99.9  | 2E-23 | 0.135 | 0.233 | 0.49 |

|             |          |       |       |       |       |      |
|-------------|----------|-------|-------|-------|-------|------|
| 6rs3115553  | 32353805 | 99.7  | 2E-23 | 0.135 | 0.233 | 0.49 |
| 6rs9268132  | 32362632 | 233.2 | 1E-52 | 0.590 | 0.393 | 2.31 |
| 6rs926070   | 32365544 | 41.1  | 1E-10 | 0.251 | 0.324 | 0.68 |
| 6rs6935269  | 32368328 | 99.4  | 2E-23 | 0.135 | 0.233 | 0.49 |
| 6rs7775397  | 32369230 | 46.4  | 1E-11 | 0.067 | 0.116 | 0.52 |
| 6rs6457536  | 32381743 | 86.5  | 1E-20 | 0.134 | 0.224 | 0.51 |
| 6rs547261   | 32390011 | 232.6 | 2E-52 | 0.590 | 0.393 | 2.31 |
| 6rs6910071  | 32390832 | 408.4 | 8E-91 | 0.473 | 0.205 | 3.29 |
| 6rs498422   | 32394739 | 29.7  | 5E-08 | 0.024 | 0.059 | 0.44 |
| 6rs547077   | 32397296 | 238.4 | 9E-54 | 0.595 | 0.396 | 2.34 |
| 6rs10484560 | 32406115 | 20.0  | 8E-06 | 0.133 | 0.093 | 1.46 |
| 6rs9405090  | 32406350 | 233.5 | 1E-52 | 0.590 | 0.393 | 2.31 |
| 6rs1003878  | 32407800 | 101.4 | 8E-24 | 0.121 | 0.224 | 0.47 |
| 6rs1033500  | 32415360 | 232.9 | 1E-52 | 0.591 | 0.391 | 2.33 |
| 6rs2076537  | 32425613 | 49.2  | 2E-12 | 0.288 | 0.373 | 0.67 |
| 6rs2395150  | 32434023 | 79.9  | 4E-19 | 0.307 | 0.421 | 0.60 |
| 6rs9268368  | 32441933 | 231.9 | 2E-52 | 0.590 | 0.393 | 2.31 |
| 6rs9268384  | 32444564 | 235.1 | 5E-53 | 0.590 | 0.393 | 2.33 |
| 6rs3129939  | 32444744 | 73.4  | 1E-17 | 0.103 | 0.178 | 0.50 |
| 6rs3129941  | 32445664 | 127.7 | 1E-29 | 0.118 | 0.231 | 0.43 |
| 6rs3129943  | 32446673 | 106.1 | 7E-25 | 0.149 | 0.260 | 0.49 |
| 6rs2050190  | 32447054 | 112.7 | 2E-26 | 0.187 | 0.321 | 0.50 |
| 6rs2050189  | 32447625 | 15.2  | 1E-04 | 0.188 | 0.231 | 0.77 |
| 6rs2395157  | 32456123 | 277.4 | 3E-62 | 0.494 | 0.274 | 2.58 |
| 6rs4424066  | 32462406 | 274.0 | 2E-61 | 0.340 | 0.568 | 0.40 |
| 6rs3117098  | 32466491 | 89.7  | 3E-21 | 0.178 | 0.295 | 0.54 |
| 6rs3817973  | 32469089 | 274.9 | 1E-61 | 0.340 | 0.568 | 0.40 |
| 6rs1980493  | 32471193 | 108.8 | 2E-25 | 0.078 | 0.165 | 0.40 |
| 6rs2076530  | 32471794 | 268.2 | 3E-60 | 0.338 | 0.564 | 0.40 |
| 6rs3817963  | 32476065 | 263.7 | 3E-59 | 0.500 | 0.286 | 2.50 |
| 6rs3763305  | 32477466 | 27.7  | 1E-07 | 0.095 | 0.052 | 1.74 |
| 6rs3806156  | 32481676 | 153.8 | 2E-35 | 0.538 | 0.367 | 1.98 |
| 6rs3763309  | 32483951 | 407.6 | 1E-90 | 0.479 | 0.217 | 3.28 |
| 6rs3129963  | 32488186 | 128.6 | 8E-30 | 0.088 | 0.189 | 0.39 |
| 6rs6932542  | 32488240 | 274.5 | 1E-61 | 0.265 | 0.484 | 0.38 |
| 6rs9268542  | 32492699 | 263.8 | 3E-59 | 0.574 | 0.369 | 2.45 |
| 6rs2395163  | 32495787 | 433.6 | 3E-96 | 0.481 | 0.212 | 3.42 |
| 6rs3135363  | 32497626 | 149.5 | 2E-34 | 0.142 | 0.286 | 0.43 |
| 6rs3135353  | 32500855 | 95.8  | 1E-22 | 0.075 | 0.154 | 0.42 |
| 6rs9501626  | 32508322 | 72.1  | 2E-17 | 0.046 | 0.109 | 0.39 |
| 6rs3135338  | 32509195 | 182.1 | 2E-41 | 0.171 | 0.326 | 0.41 |
| 6rs7356880  | 32509305 | 18.3  | 2E-05 | 0.025 | 0.046 | 0.53 |

|             |          |       |        |       |       |      |
|-------------|----------|-------|--------|-------|-------|------|
| 6rs2395173  | 32512837 | 186.3 | 2E-42  | 0.173 | 0.331 | 0.41 |
| 6rs2395174  | 32512856 | 19.9  | 8E-06  | 0.257 | 0.302 | 0.76 |
| 6rs2395175  | 32513004 | 486.5 | 8E-108 | 0.452 | 0.166 | 3.85 |
| 6rs3129871  | 32514320 | 217.6 | 3E-49  | 0.183 | 0.357 | 0.39 |
| 6rs3129882  | 32517508 | 148.4 | 4E-34  | 0.248 | 0.412 | 0.49 |
| 6rs2239804  | 32519501 | 172.9 | 2E-39  | 0.407 | 0.564 | 0.49 |
| 6rs7192     | 32519624 | 297.6 | 1E-66  | 0.215 | 0.417 | 0.35 |
| 6rs2395182  | 32521295 | 103.1 | 3E-24  | 0.127 | 0.226 | 0.47 |
| 6rs3129890  | 32522251 | 166.8 | 4E-38  | 0.141 | 0.281 | 0.41 |
| 6rs9268832  | 32535767 | 296.0 | 2E-66  | 0.220 | 0.425 | 0.35 |
| 6rs6903608  | 32536263 | 162.7 | 3E-37  | 0.145 | 0.296 | 0.42 |
| 6rs2395185  | 32541145 | 330.8 | 7E-74  | 0.549 | 0.309 | 2.76 |
| 6rs2516049  | 32678378 | 314.2 | 3E-70  | 0.536 | 0.300 | 2.70 |
| 6rs660895   | 32685358 | 490.6 | 1E-108 | 0.503 | 0.210 | 3.62 |
| 6rs9271366  | 32694832 | 69.8  | 7E-17  | 0.084 | 0.150 | 0.49 |
| 6rs3129763  | 32698903 | 103.1 | 3E-24  | 0.117 | 0.235 | 0.47 |
| 6rs2187668  | 32713862 | 57.2  | 4E-14  | 0.067 | 0.125 | 0.48 |
| 6rs1063355  | 32735692 | 66.6  | 3E-16  | 0.317 | 0.418 | 0.63 |
| 6rs9275141  | 32759095 | 151.8 | 7E-35  | 0.369 | 0.521 | 0.51 |
| 6rs9275184  | 32762692 | 263.1 | 4E-59  | 0.288 | 0.107 | 3.24 |
| 6rs7775228  | 32766057 | 85.0  | 3E-20  | 0.053 | 0.127 | 0.38 |
| 6rs5000634  | 32771542 | 269.0 | 2E-60  | 0.595 | 0.382 | 2.46 |
| 6rs6457617  | 32771829 | 441.4 | 5E-98  | 0.230 | 0.496 | 0.29 |
| 6rs2647012  | 32772436 | 301.4 | 2E-67  | 0.197 | 0.399 | 0.34 |
| 6rs9357152  | 32772938 | 25.5  | 4E-07  | 0.281 | 0.239 | 1.37 |
| 6rs9275312  | 32773706 | 209.6 | 2E-47  | 0.316 | 0.145 | 2.59 |
| 6rs1794282  | 32774504 | 57.4  | 4E-14  | 0.061 | 0.115 | 0.47 |
| 6rs9275390  | 32777134 | 274.5 | 1E-61  | 0.490 | 0.267 | 2.56 |
| 6rs2856705  | 32778934 | 74.2  | 7E-18  | 0.033 | 0.095 | 0.34 |
| 6rs9275572  | 32786977 | 325.2 | 1E-72  | 0.218 | 0.430 | 0.34 |
| 6rs7745656  | 32788948 | 106.1 | 7E-25  | 0.123 | 0.251 | 0.47 |
| 6rs2858331  | 32789255 | 18.8  | 1E-05  | 0.299 | 0.375 | 0.78 |
| 6rs3873444  | 32790702 | 68.6  | 1E-16  | 0.040 | 0.102 | 0.38 |
| 6rs3892710  | 32790840 | 23.6  | 1E-06  | 0.234 | 0.175 | 1.39 |
| 6rs3916765  | 32793528 | 128.0 | 1E-29  | 0.245 | 0.122 | 2.24 |
| 6rs12177980 | 32794062 | 28.4  | 1E-07  | 0.458 | 0.395 | 1.34 |
| 6rs9461799  | 32797507 | 28.3  | 1E-07  | 0.458 | 0.395 | 1.34 |
| 6rs2239800  | 32821245 | 16.1  | 6E-05  | 0.060 | 0.090 | 0.65 |
| 6rs2071800  | 32822121 | 50.2  | 1E-12  | 0.115 | 0.064 | 2.01 |
| 6rs7756516  | 32831895 | 26.1  | 3E-07  | 0.468 | 0.523 | 0.76 |
| 6rs7774954  | 32832167 | 34.1  | 5E-09  | 0.026 | 0.061 | 0.44 |
| 6rs719653   | 32860544 | 28.4  | 1E-07  | 0.240 | 0.298 | 0.72 |

|             |          |       |       |       |       |      |
|-------------|----------|-------|-------|-------|-------|------|
| 6rs7762279  | 32863268 | 43.6  | 4E-11 | 0.061 | 0.110 | 0.52 |
| 6rs7758736  | 32866372 | 63.5  | 2E-15 | 0.110 | 0.185 | 0.54 |
| 6rs2621330  | 32889502 | 17.9  | 2E-05 | 0.012 | 0.030 | 0.42 |
| 6rs2856997  | 32889754 | 22.7  | 2E-06 | 0.483 | 0.417 | 1.30 |
| 6rs7383287  | 32891064 | 52.5  | 4E-13 | 0.140 | 0.221 | 0.59 |
| 6rs2071554  | 32892654 | 84.2  | 4E-20 | 0.123 | 0.053 | 2.50 |
| 6rs2857107  | 32893493 | 43.4  | 4E-11 | 0.048 | 0.099 | 0.48 |
| 6rs10484565 | 32903010 | 98.9  | 3E-23 | 0.178 | 0.082 | 2.27 |
| 6rs241437   | 32905662 | 43.5  | 4E-11 | 0.304 | 0.394 | 0.69 |
| 6rs3819721  | 32912776 | 145.1 | 2E-33 | 0.401 | 0.241 | 2.03 |
| 6rs9357155  | 32917826 | 44.4  | 3E-11 | 0.191 | 0.121 | 1.66 |
| 6rs2071543  | 32919607 | 36.1  | 2E-09 | 0.199 | 0.134 | 1.56 |
| 6rs241407   | 32970718 | 54.9  | 1E-13 | 0.174 | 0.101 | 1.81 |
| 6rs154981   | 32988971 | 20.5  | 6E-06 | 0.424 | 0.491 | 0.78 |
| 6rs151719   | 33011878 | 23.8  | 1E-06 | 0.178 | 0.227 | 0.72 |
| 6rs1480380  | 33021224 | 37.5  | 9E-10 | 0.049 | 0.089 | 0.51 |
| 6rs194682   | 33022591 | 22.6  | 2E-06 | 0.412 | 0.349 | 1.31 |
| 6rs209474   | 33032562 | 17.5  | 3E-05 | 0.484 | 0.428 | 1.26 |
| 6rs3130597  | 33049169 | 15.8  | 7E-05 | 0.064 | 0.084 | 0.66 |
| 6rs620202   | 33049888 | 20.2  | 7E-06 | 0.360 | 0.299 | 1.30 |
| 6rs565876   | 33058028 | 21.0  | 5E-06 | 0.461 | 0.395 | 1.29 |
| 6rs3135034  | 33059640 | 69.0  | 1E-16 | 0.153 | 0.083 | 2.04 |
| 6rs2395300  | 33076254 | 24.2  | 9E-07 | 0.267 | 0.342 | 0.75 |
| 6rs172274   | 33077435 | 28.6  | 9E-08 | 0.272 | 0.355 | 0.73 |
| 6rs206762   | 33078428 | 20.5  | 6E-06 | 0.508 | 0.432 | 1.28 |
| 6rs2581     | 33082379 | 34.0  | 6E-09 | 0.528 | 0.439 | 1.37 |
| 6rs381218   | 33085398 | 26.6  | 3E-07 | 0.326 | 0.250 | 1.36 |
| 6rs429916   | 33086565 | 36.6  | 1E-09 | 0.037 | 0.076 | 0.48 |
| 6rs2395309  | 33134224 | 50.6  | 1E-12 | 0.098 | 0.168 | 0.56 |
| 6rs3077     | 33141000 | 49.7  | 2E-12 | 0.100 | 0.169 | 0.56 |
| 6rs9277341  | 33147603 | 20.7  | 5E-06 | 0.235 | 0.298 | 0.76 |
| 6rs987870   | 33150858 | 34.2  | 5E-09 | 0.076 | 0.130 | 0.59 |
| 6rs9277535  | 33162839 | 41.0  | 2E-10 | 0.164 | 0.231 | 0.64 |
| 6rs9277554  | 33163516 | 54.6  | 1E-13 | 0.205 | 0.288 | 0.63 |
| 6rs9277565  | 33164875 | 19.7  | 9E-06 | 0.159 | 0.201 | 0.73 |
| 6rs3128917  | 33167974 | 40.7  | 2E-10 | 0.188 | 0.255 | 0.66 |
| 6rs3117222  | 33168927 | 41.0  | 2E-10 | 0.188 | 0.255 | 0.66 |
| 6rs2064478  | 33180244 | 26.0  | 3E-07 | 0.166 | 0.217 | 0.70 |
| 6rs3130215  | 33182941 | 32.8  | 1E-08 | 0.501 | 0.414 | 1.37 |
| 6rs3117230  | 33183613 | 25.6  | 4E-07 | 0.166 | 0.216 | 0.71 |
| 6rs1883414  | 33194426 | 19.4  | 1E-05 | 0.243 | 0.297 | 0.76 |
| 6rs6901221  | 33206254 | 19.2  | 1E-05 | 0.126 | 0.164 | 0.71 |



|             |           |      |       |       |       |      |
|-------------|-----------|------|-------|-------|-------|------|
| 6rs2395365  | 33224200  | 16.8 | 4E-05 | 0.354 | 0.407 | 0.79 |
| 6rs756441   | 33230149  | 16.1 | 6E-05 | 0.357 | 0.409 | 0.80 |
| 6rs986521   | 33244123  | 24.1 | 9E-07 | 0.326 | 0.249 | 1.34 |
| 6rs439205   | 33281820  | 26.5 | 3E-07 | 0.173 | 0.224 | 0.70 |
| 6rs421446   | 33282761  | 32.2 | 1E-08 | 0.200 | 0.265 | 0.69 |
| 6rs213199   | 33343733  | 23.2 | 1E-06 | 0.293 | 0.360 | 0.76 |
| 6rs2282851  | 33388287  | 19.1 | 1E-05 | 0.372 | 0.306 | 1.28 |
| 6rs3130100  | 33391744  | 31.8 | 2E-08 | 0.394 | 0.469 | 0.73 |
| 6rs2239839  | 33396053  | 19.2 | 1E-05 | 0.373 | 0.307 | 1.28 |
| 6rs3130014  | 33420286  | 15.6 | 8E-05 | 0.267 | 0.318 | 0.79 |
| 6rs211455   | 33436496  | 20.4 | 6E-06 | 0.232 | 0.295 | 0.76 |
| 6rs211452   | 33438959  | 27.5 | 2E-07 | 0.290 | 0.362 | 0.74 |
| 6rs3130276  | 33444908  | 18.5 | 2E-05 | 0.434 | 0.367 | 1.27 |
| 6rs211456   | 33497359  | 18.0 | 2E-05 | 0.315 | 0.372 | 0.79 |
| 6rs2247385  | 33529555  | 20.1 | 7E-06 | 0.322 | 0.385 | 0.78 |
| 6rs6935686  | 33722105  | 21.3 | 4E-06 | 0.252 | 0.197 | 1.36 |
| 6rs4259245  | 33732199  | 15.1 | 1E-04 | 0.324 | 0.379 | 0.80 |
| 6rs4713653  | 33755572  | 31.5 | 2E-08 | 0.248 | 0.319 | 0.71 |
| 6rs4713654  | 33755629  | 30.9 | 3E-08 | 0.249 | 0.320 | 0.72 |
| 6rs3818528  | 33769069  | 31.2 | 2E-08 | 0.281 | 0.347 | 0.72 |
| 6rs594223   | 33775943  | 19.4 | 1E-05 | 0.105 | 0.144 | 0.70 |
| 6rs2281829  | 33783620  | 43.7 | 4E-11 | 0.548 | 0.457 | 1.43 |
| 6rs2966     | 33797498  | 41.3 | 1E-10 | 0.544 | 0.457 | 1.42 |
| 6rs4713668  | 33798774  | 43.6 | 4E-11 | 0.547 | 0.458 | 1.43 |
| 6rs6457740  | 33805103  | 31.3 | 2E-08 | 0.214 | 0.274 | 0.70 |
| 6rs652049   | 33819398  | 20.5 | 6E-06 | 0.146 | 0.191 | 0.72 |
| 6rs9469583  | 33825748  | 48.6 | 3E-12 | 0.362 | 0.454 | 0.68 |
| 6rs1536500  | 33831361  | 20.4 | 6E-06 | 0.153 | 0.199 | 0.72 |
| 6rs6919321  | 33831982  | 32.2 | 1E-08 | 0.310 | 0.389 | 0.72 |
| 6rs9380376  | 33832772  | 16.9 | 4E-05 | 0.360 | 0.304 | 1.27 |
| 6rs2296748  | 33853049  | 18.2 | 2E-05 | 0.425 | 0.365 | 1.27 |
| 6rs3806109  | 33878348  | 18.4 | 2E-05 | 0.421 | 0.360 | 1.27 |
| 6rs9394169  | 33886942  | 32.5 | 1E-08 | 0.396 | 0.478 | 0.73 |
| 6rs1535950  | 33893805  | 20.1 | 7E-06 | 0.408 | 0.343 | 1.28 |
| 6rs9296264  | 38908879  | 17.1 | 3E-05 | 0.271 | 0.317 | 0.78 |
| 9rs1412224  | 81421590  | 16.4 | 5E-05 | 0.292 | 0.242 | 1.28 |
| 9rs1953126  | 120720054 | 26.8 | 2E-07 | 0.404 | 0.332 | 1.34 |
| 9rs10985073 | 120723409 | 27.9 | 1E-07 | 0.491 | 0.414 | 1.34 |
| 9rs881375   | 120732452 | 28.3 | 1E-07 | 0.408 | 0.333 | 1.35 |
| 9rs3761847  | 120769793 | 30.8 | 3E-08 | 0.487 | 0.407 | 1.36 |
| 9rs7026551  | 120812687 | 22.5 | 2E-06 | 0.238 | 0.181 | 1.37 |
| 9rs2269066  | 120816572 | 17.9 | 2E-05 | 0.131 | 0.094 | 1.44 |

|              |           |      |       |       |       |      |
|--------------|-----------|------|-------|-------|-------|------|
| 9rs7037673   | 120820038 | 20.3 | 7E-06 | 0.380 | 0.444 | 0.78 |
| 9rs2416810   | 120864754 | 15.7 | 7E-05 | 0.213 | 0.167 | 1.31 |
| 10rs1913517  | 49789060  | 18.1 | 2E-05 | 0.408 | 0.475 | 0.79 |
| 10rs12252317 | 64316874  | 19.3 | 1E-05 | 0.086 | 0.059 | 1.60 |
| 10rs7068751  | 64367154  | 17.1 | 4E-05 | 0.083 | 0.058 | 1.56 |
| 10rs2935689  | 123476616 | 17.7 | 3E-05 | 0.165 | 0.123 | 1.38 |
| 10rs4271313  | 134773476 | 18.1 | 2E-05 | 0.484 | 0.430 | 1.26 |
| 11rs2714078  | 122875449 | 16.4 | 5E-05 | 0.278 | 0.319 | 0.79 |
| 12rs941152   | 130516217 | 17.6 | 3E-05 | 0.273 | 0.336 | 0.78 |
| 14rs12885166 | 92195035  | 15.5 | 8E-05 | 0.373 | 0.316 | 1.25 |
| 14rs11160325 | 95808257  | 16.5 | 5E-05 | 0.520 | 0.463 | 1.24 |
| 14rs945034   | 95809627  | 19.5 | 1E-05 | 0.461 | 0.398 | 1.27 |
| 14rs11851852 | 104239473 | 15.5 | 8E-05 | 0.055 | 0.084 | 0.64 |
| 15rs11852946 | 36975713  | 18.1 | 2E-05 | 0.074 | 0.109 | 0.66 |
| 16rs4924     | 54953987  | 15.2 | 1E-04 | 0.446 | 0.491 | 0.81 |
| 16rs2440468  | 54978095  | 15.7 | 7E-05 | 0.446 | 0.490 | 0.81 |
| 17rs212470   | 29748906  | 17.0 | 4E-05 | 0.268 | 0.213 | 1.30 |
| 17rs8069038  | 59564896  | 16.3 | 5E-05 | 0.048 | 0.071 | 0.62 |
| 17rs3924958  | 68157041  | 15.5 | 8E-05 | 0.082 | 0.109 | 0.70 |
| 19rs8104309  | 36858686  | 15.1 | 1E-04 | 0.184 | 0.142 | 1.33 |
| 20rs6074022  | 44173603  | 21.5 | 4E-06 | 0.216 | 0.269 | 0.74 |
| 20rs1569723  | 44175471  | 22.0 | 3E-06 | 0.215 | 0.270 | 0.74 |
| 20rs4811846  | 55430874  | 16.0 | 6E-05 | 0.342 | 0.290 | 1.26 |
| 20rs1182531  | 57826397  | 21.1 | 4E-06 | 0.154 | 0.205 | 0.72 |

**Describe your ethnic/racial background - Based on your 4 grandparents**

**PLEASE CHECK ALL THAT APPLY:**

**White**

- Northern European (England, Scotland, Wales, Ireland, N. France, Holland, Belgium, Switzerland)
- Scandinavian (Denmark, Norway, Sweden, Finland)
- Southern European (Spain, Portugal, Italy, S. France)
- Central European (Germany, Austria, Hungary)
- Eastern European (Russia, Poland, Romania, Ukraine, Lithuania, Latvia, Estonia, Czech Republic)
- East Mediterranean (Greece, Turkey, Croatia, Bosnia, Yugoslavia, Albania)
- Northern Africa
- Middle East
- French Canada
- South Africa

**Jewish**

- Ashkenazi Jewish
- Sephardic Jewish
- Unknown

**American Indian/Alaska Native**

- North America
- South America (includes Central America)

**Latino/Hispanic**

- Mexican
- Central American
- South American
- West Indian
- Dominican
- Puerto Rican
- Cuban

**Native Hawaiian/Pacific Islander**

- Hawaiian
- Samoan
- Guamanian or Chamorro
- Pacific Islands

**Black/African-American**

- African-American
- African heritage
- West Indian

**Asian**

- Chinese
- Korean
- Filipino
- Pakistani
- Vietnamese
- Cambodian
- Japanese
- Malaysian
- Thai
- Indian

**Unknown**

**To the best of your knowledge, your 4 Grandparents or their ancestors came from:**

Maternal Grandmother \_\_\_\_\_

Maternal Grandfather \_\_\_\_\_

Paternal Grandmother \_\_\_\_\_

Paternal Grandfather \_\_\_\_\_

| <b>GENE</b> | <b>LOC</b>    | <b>WTCCC_SNF</b> | <b>WTCCC_MAF_con</b> | <b>WTCCC_MAF_casi</b> | <b>ILLUMINA_SNF</b> |
|-------------|---------------|------------------|----------------------|-----------------------|---------------------|
| 7q32        | 130.80-130.84 | rs11761231       | 0.38                 | 0.33                  | rs12536699          |
| 10p15       | 6.07-6.17     | rs2104286        | 0.29                 | 0.25                  | rs12722561          |
| 1p36        | 2.44-2.77     | rs6684865        | 0.34                 | 0.29                  | rs3890745           |
| 1p31        | 80.16-80.36   | rs11162922       | 0.07                 | 0.05                  | rs6424687           |
| 4p15        | 24.99-25.13   | rs3816587        | 0.41                 | 0.43                  | rs6840622           |
| 6q23        | 138.00-138.06 | rs6920220        | 0.22                 | 0.26                  | rs2327832           |
| 7q32        | 130.80-130.84 | rs11761231       | 0.38                 | 0.33                  | rs12536699          |
| 10p15       | 6.07-6.16     | rs2104286        | 0.29                 | 0.24                  | rs12722561          |
| 13q12       | 19.845-19.855 | rs9550642        | 0.08                 | 0.11                  | rs4770010           |
| 21q22       | 41.430-41.465 | rs2837960        | 0.17                 | 0.19                  | rs2837960           |
| 22q13       | 35.870-35.885 | rs743777         | 0.29                 | 0.34                  | rs929022            |

**r2\_CEUP\_corr\_NARAC-EIRA**

|      |         |
|------|---------|
| 0.65 | 0.07    |
| 0.55 | 0.80    |
| 1.00 | 0.08    |
| 1.00 | 0.23    |
| 0.81 | 0.75    |
| 1.00 | 0.00013 |
| 0.65 | 0.07    |
| 0.55 | 0.80    |
| 0.45 | 0.76    |
| 1.00 | 0.17    |
| 0.96 | 0.05    |

# Supplemental Figure 1

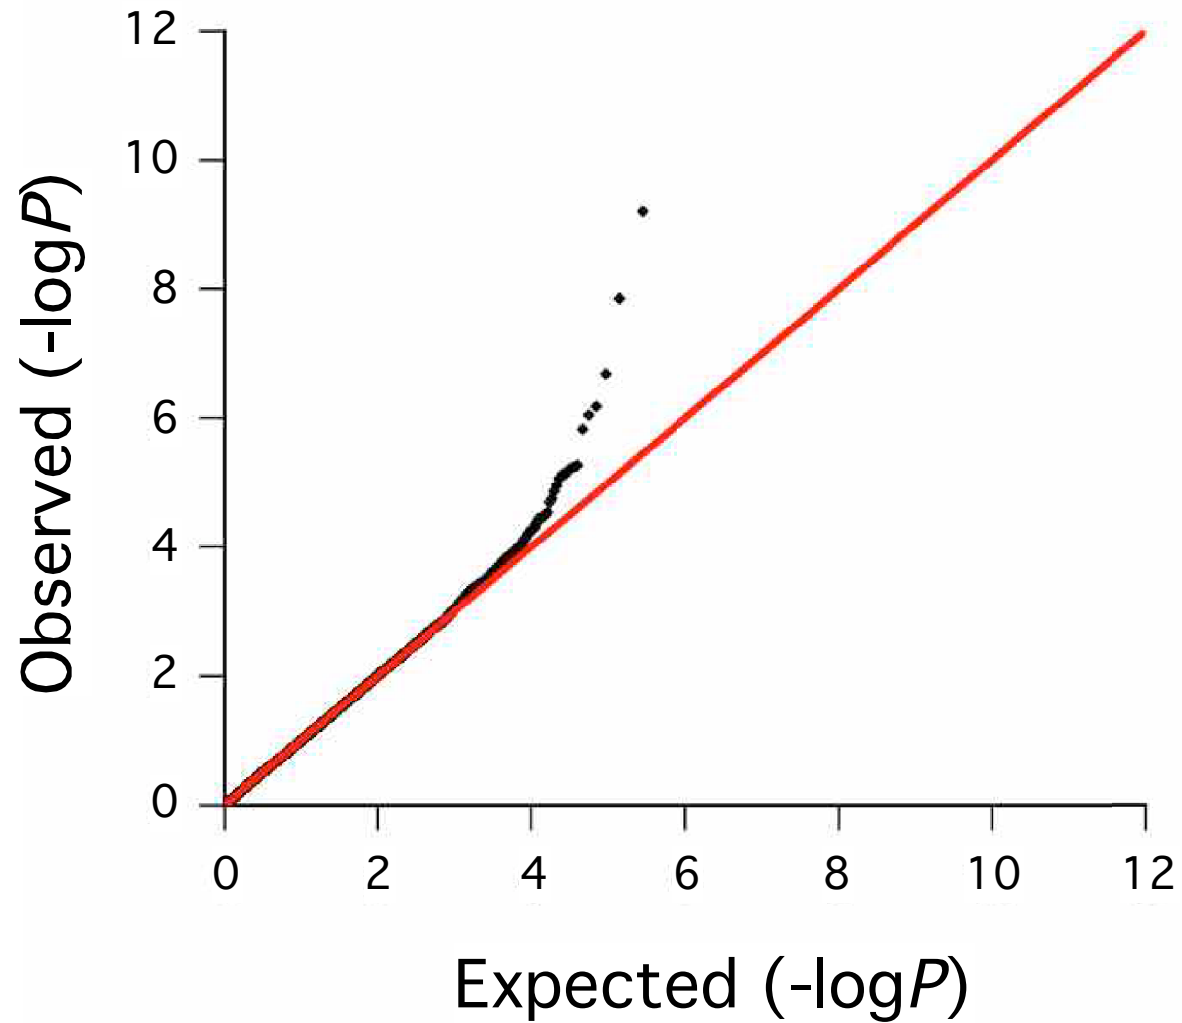

Supplement: NIHMS85972-supplement-supp_data.pdf [file NIHMS85972-supplement-supp_data.pdf]
